# Supplementary material
Source: publisher figshare collection journal article supplement (https://acs.figshare.com/ndownloader/files/4549219)
Supplement: Supplementary file 1 [file 4549219]

Supporting information

## Temperature-Induced Intracellular Uptake of Thermoresponsive Polymeric Micelles

*Jun Akimoto<sup>a, b</sup>, Masamichi Nakayama<sup>a</sup>, Kiyotaka Sakai<sup>b</sup>, and Teruo Okano<sup>a</sup>*

<sup>a</sup>Institute of Advanced Biomedical Engineering and Science, Tokyo Women's Medical  
University, TWIns, Kawada-cho 8-1, Shinjuku, Tokyo 162-8666, Japan

<sup>b</sup>Department of Applied Chemistry, Waseda University,  
Ohkubo 3-4-1, Shinjuku, Tokyo 169-8555, Japan

## 1. Characterization of polymers

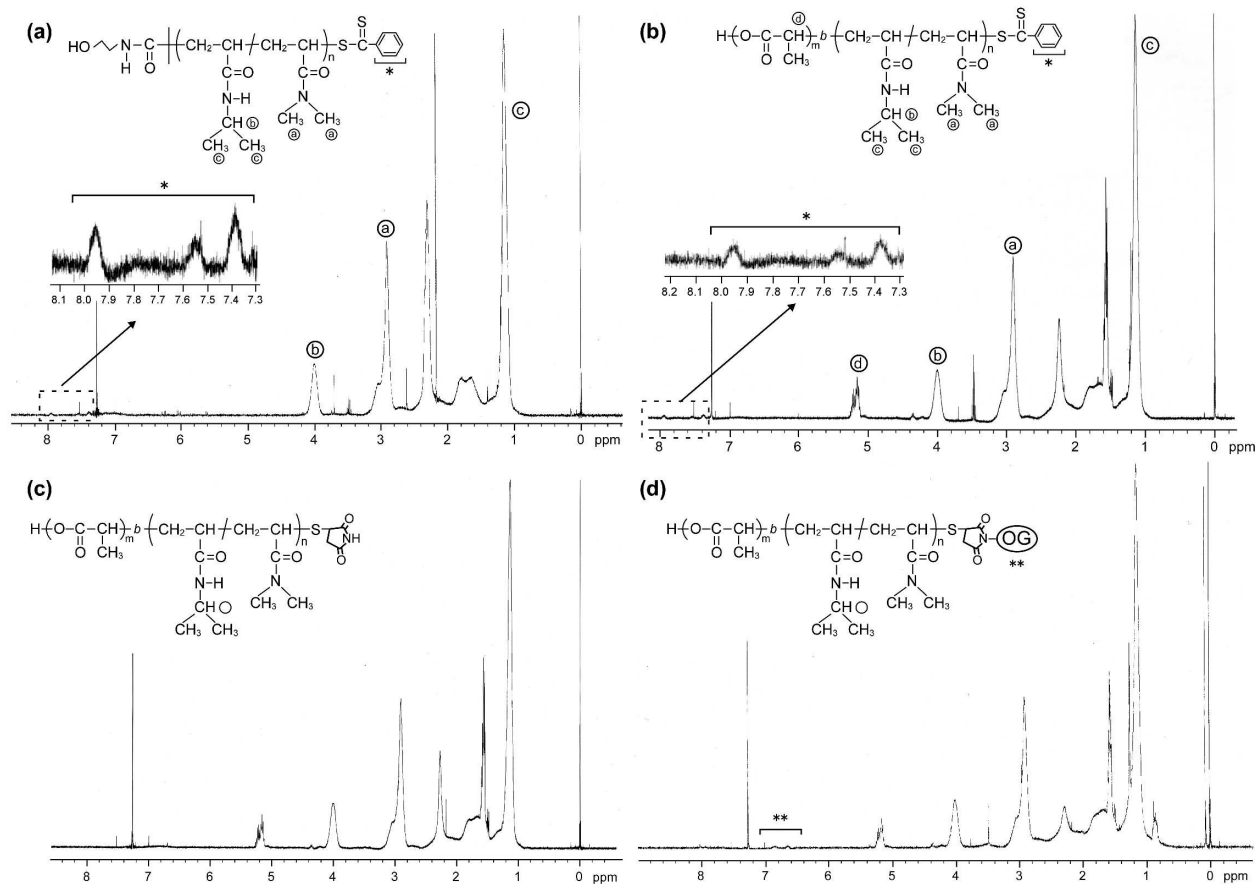

**Figure S1.**  $^1\text{H}$ -NMR spectra (in  $\text{CDCl}_3$ ) of (a) TBT-P(IPAAm-co-DMAAm)-OH, (b) TBT-P(IPAAm-co-DMAAm)-b-PLA, (c) Mal-terminated P(IPAAm-co-DMAAm)-b-PLA, and (d) OG-terminated P(IPAAm-co-DMAAm)-b-PLA.

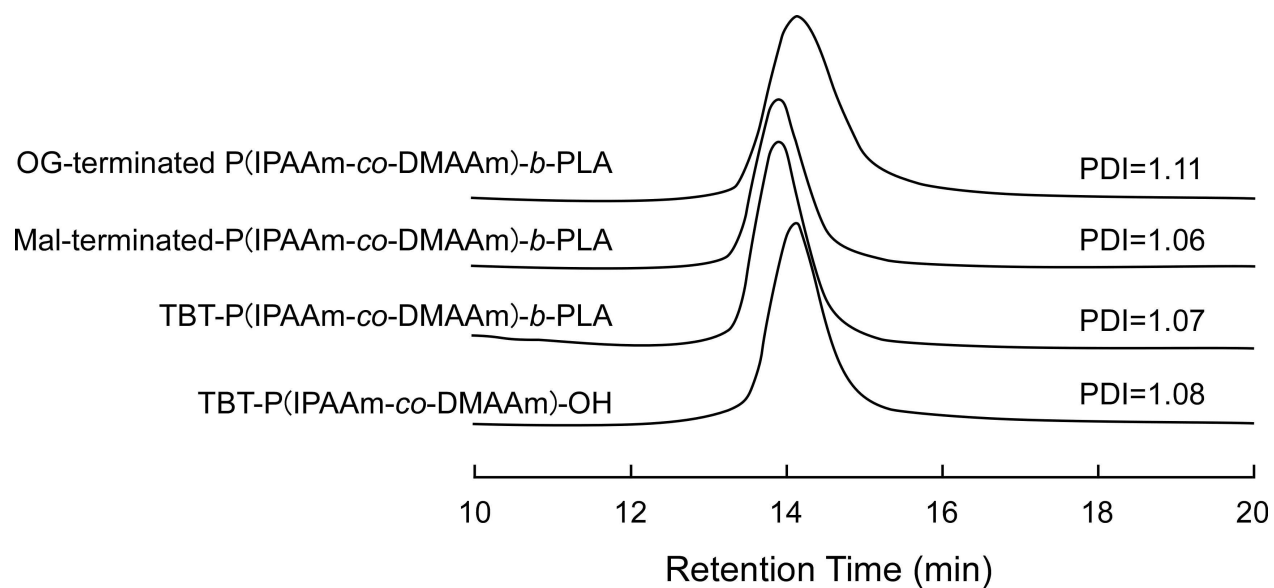

**Figure S2.** GPC curves of thermoresponsive polymers.

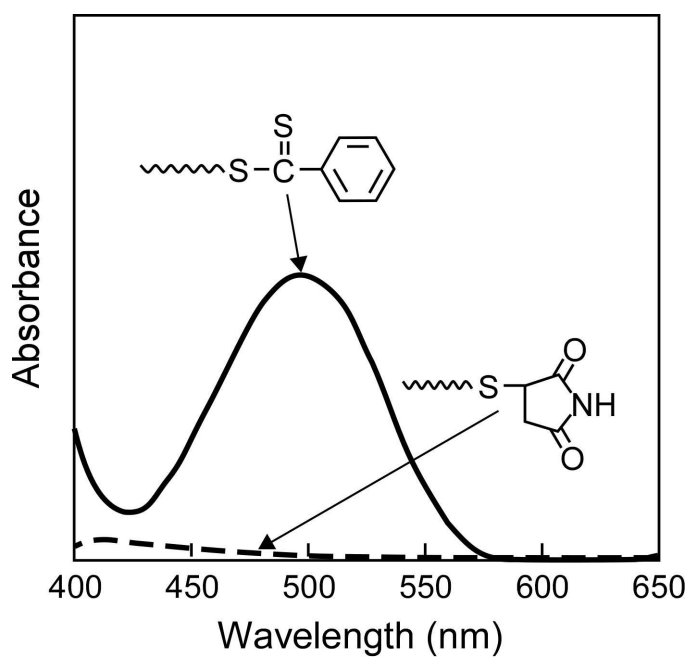

**Figure S3.** UV spectra of TBT-P(IPAAm-co-DMAAm)-*b*-PLA block copolymers before and after terminal maleimide modification.

## Characterization of thermoresponsive polymeric micelles

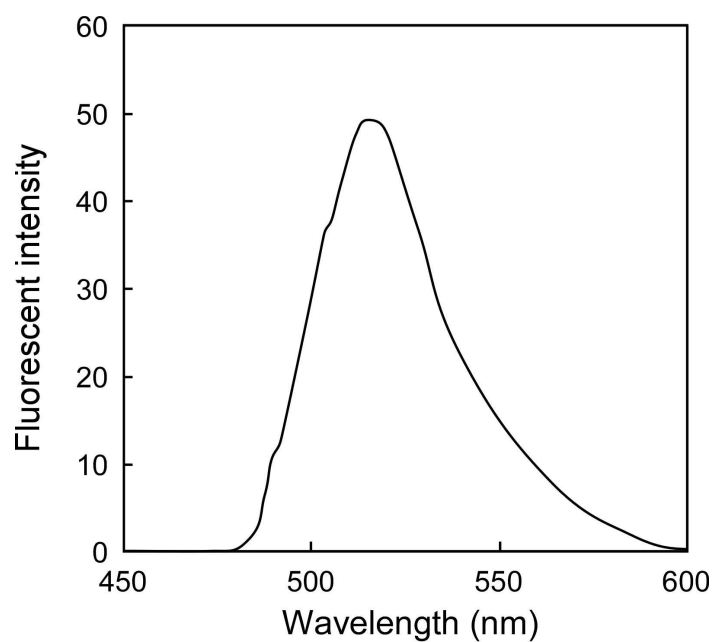

**Figure S4** Fluorescence spectrum of OG-labeled thermoresponsive polymeric micelles in water.

$\lambda_{\text{ex}}=495\text{nm}$ .

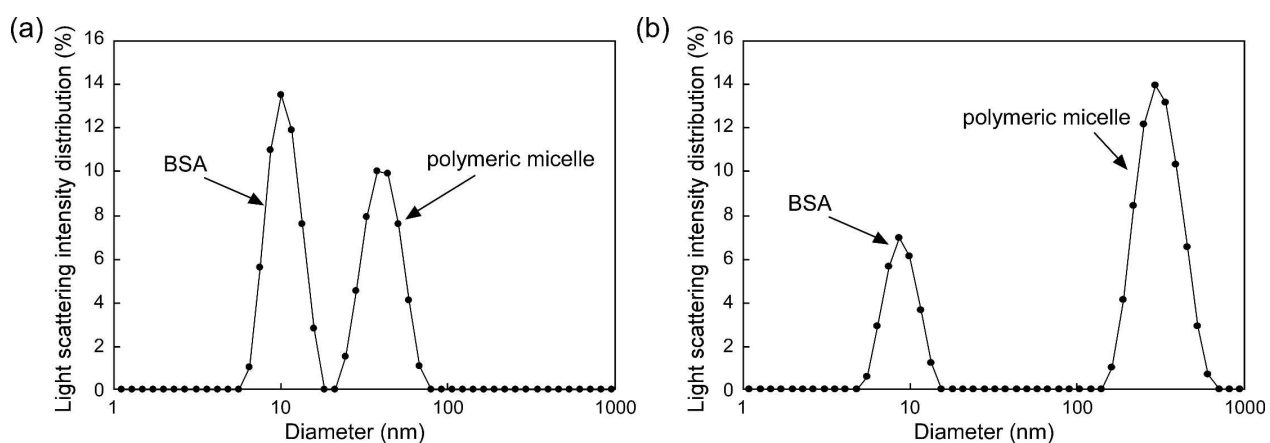

**Figure S5** Size distribution of OG-labeled thermoresponsive polymeric micelles in the presence of bovine serum albumin (BSA) at temperatures (a) below (37°C) and (b) above (42°C) the LCST in DPBS(-). [polymer]=0.2mg/mL, [BSA]=1mg/mL.

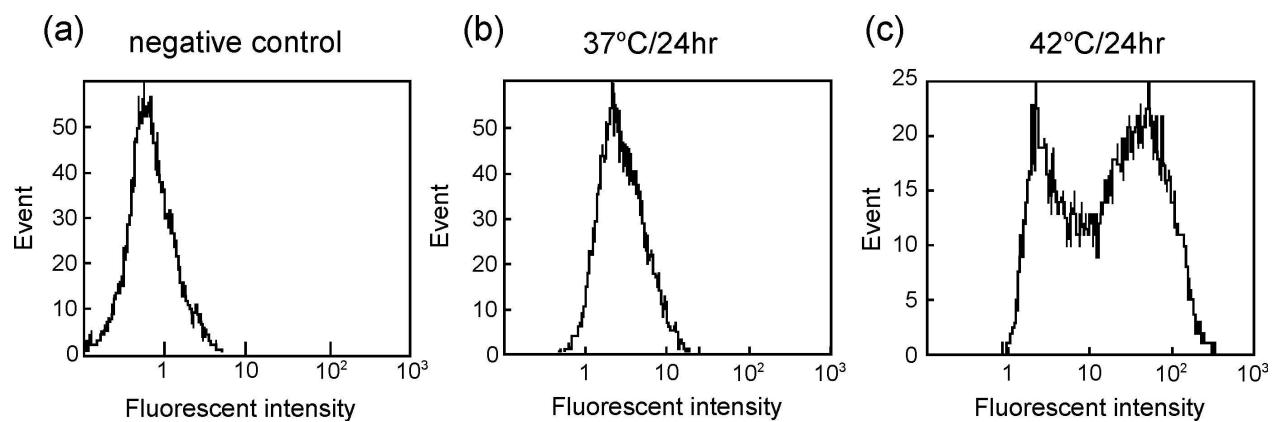

**Figure S6** Flow cytometric fluorescence histograms of bovine carotid endothelial cells incubated with or without OG-labeled thermoresponsive polymeric micelles for 24 h. (a) Basal fluorescence of the cells, (b) below (37°C) and (c) above (42°C) the micelle LCST.
